# Supplementary material for: multiplierz: an extensible API based desktop environment for proteomics data analysis
Source: PubMed Central journal article supplement (PMC2774704; doi:10.1186/1471-2105-10-364), 2009-10-29
Supplement: 1471-2105-10-364-S3.pdf [file 1471-2105-10-364-S3.pdf]

Description of multiplierz Tools:

| <b>Tool</b>        | <b>Description</b>                                                                                                                                           |
|--------------------|--------------------------------------------------------------------------------------------------------------------------------------------------------------|
| Download Mascot    | Automatically download and generate Mascot reports as multiplierz spreadsheets                                                                               |
| Multifile Detect   | Detect number of occurrences of combinations of protein, peptide sequence, variable modifications, and charge state across multiple multiplierz spreadsheets |
| Filter Multifiles  | Filter multiplierz spreadsheets for a specified list of proteins or peptides                                                                                 |
| Download GenBank   | Generate genbank report by automatically downloading and parsing genbank files for proteins in a multiplierz spreadsheet                                     |
| Fragmenter         | Generate in-silico peptide fragmentation pattern for commonly occurring ions                                                                                 |
| Digester           | Generate a list of enzymatic digestions using a variety of enzymes for given protein(s)                                                                      |
| Retrieve Peaks     | Extract precursor, chromatographic, and ms/ms information from mass spectrometry raw peak files using mzAPI                                                  |
| Mascot Web Extract | Download information such as protein coverage and fragment identification on MS/MS images stored in Mascot web reports                                       |
| Formatter          | Convert Mascot CSV and Protein Prophet Peptide Summary files to multiplierz spreadsheets                                                                     |
| Console            | Interactively script the multiplierz libraries and environment for mass informatics exploration                                                              |
| Peak Viewer        | Interactive visual environment for in-depth interrogation of mass spectra                                                                                    |
| Combined Peaks     | Retrieve Peaks for merged searches or combined search results                                                                                                |
| Full Report Wizard | Download Mascot results, Mascot web information, Genbank information, and peak information through one tool                                                  |
